# Supplementary material for: Baseline neutrophil-to-eosinophil-ratio and outcome in metastatic clear-cell renal cell carcinoma treated with nivolumab or ipilimumab/nivolumab
Source: PubMed Central journal article supplement (PMC11332468; doi:10.2340/1651-226x.2024.40390), 2024-08-11
Supplement: AO-63-40390-s2.pdf [file AO-63-40390-s2.pdf]

Supplementary material has been published as submitted. It has not been copyedited, or typeset by Acta Oncologica

**SUPPLEMENTAL TABLE 1: HARREL C-INDEX**

|            | <b>C-index (95% CI)</b> |                   |                   |                      |
|------------|-------------------------|-------------------|-------------------|----------------------|
|            | <b>IMDC</b>             | <b>IMDC + NER</b> | <b>IMDC + NLR</b> | <b>IMDC + EOSINO</b> |
| <b>PFS</b> |                         |                   |                   |                      |
|            | 0.58 (0.54;0.63)        | 0.59 (0.54;0.65)  | 0.58 (0.53;0.64)  | 0.59 (0.54;0.65)     |
| <b>OS</b>  |                         |                   |                   |                      |
|            | 0.64 (0.60;0.69)        | 0.68 (0.63;0.73)  | 0.67 (0.61;0.73)  | 0.68 (0.63;0.73)     |

**SUPPLEMENTAL TABLE 2: IMPACT OF NER IN OTHER CLINICAL SETTINGS**

For NER, NLR and eosinophils, HR reflect the relative change in risk of progression or death for a doubling (x2 units) of the predictor value.

| <b>Test</b>                                                       |                      | <b>HR (95% CI)</b> | <b>P-value</b> |
|-------------------------------------------------------------------|----------------------|--------------------|----------------|
| <b>Impact on time-to-metastasis (univariate analysis) (n=315)</b> |                      |                    |                |
| NER                                                               | x2 units             | 1.12 (0.98;1.27)   | 0.10           |
| NLR                                                               | x2 units             | 1.68 (1.28;2.20)   | 0.0002         |
| Eosinophils                                                       | x2 units             | 0.92 ((0.79;1.06)  | 0.24           |
| <b>Impact on PFS on VEGFR-TKIs (univariate analysis) (n=100)</b>  |                      |                    |                |
| NER                                                               | x2 units             | 1.22 (1.06;1.41)   | 0.007          |
| Eosinophils                                                       | x2 units             | 0.86 (0.72;1.03)   | 0.09           |
| <b>Impact on PFS on VEGFR-TKIs (bivariate analysis) (n=100)</b>   |                      |                    |                |
| NER                                                               | x2 units             | 1.13 (0.97;1.31)   | 0.11           |
| IMDC                                                              | Global test          |                    | 0.002          |
|                                                                   | Good vs Poor         | 0.23 (0.10;0.52)   | 0.0005         |
|                                                                   | Intermediate vs Poor | 0.50 (0.29;0.87)   | 0.01           |
| <b>Impact on OS on VEGFR-TKIs (univariate analysis) (n=100)</b>   |                      |                    |                |
| NER                                                               | x2 units             | 1.18 (1.05;1.32)   | 0.005          |
| Eosinophils                                                       | x2 units             | 0.88 (0.76;1.01)   | 0.07           |
| <b>Impact on OS on VEGFR-TKIs (bivariate analysis) (n=100)</b>    |                      |                    |                |
| NER                                                               | x2 units             | 1.11 (0.99;1.24)   | 0.08           |
| IMDC                                                              | Global test          |                    | 0.0003         |
|                                                                   | Good vs Poor         | 0.23 (0.11;0.48)   | <.0001         |
|                                                                   | Intermediate vs Poor | 0.48 (0.30;0.79)   | 0.004          |

**SUPPLEMENTAL TABLE 3: IMPACT OF THE EVOLUTION OF NER AND EOSINOPHIL COUNT BETWEEN BASELINE AND WEEK 6**

HR reflect the relative change in risk of progression or death for a doubling (x2 units) of the predictor value.

| <b>Variable</b> | <b>Test</b> | <b>HR (95% CI)</b> | <b>P-value</b> |
|-----------------|-------------|--------------------|----------------|
| PFS (n=169)     |             |                    |                |
| Change in NER   | x2 units    | 1.04 (0.95;1.14)   | 0.36           |
| Change in EO    | x2 units    | 0.97 (0.88;1.07)   | 0.51           |
| OS (n=169)      |             |                    |                |
| Change in NER   | x2 units    | 1.03 (0.93;1.14)   | 0.61           |
| Change in EO    | x2 units    | 0.97 (0.86;1.09)   | 0.62           |

**SUPPLEMENTAL TABLE 4: SUMMARY OF LITERATURE DATA ON THE IMPACT OF NER ON OUTCOME**

| Article              | Tumour type | Number of patients | Treatment                                     | NER cut-off    | OS                                                                                                                 | PFS                                                                                                             | ORR                               |
|----------------------|-------------|--------------------|-----------------------------------------------|----------------|--------------------------------------------------------------------------------------------------------------------|-----------------------------------------------------------------------------------------------------------------|-----------------------------------|
| Zhuang et al. (2022) | mRCC        | 184                | Nivolumab-Ipilimumab, Pembrolizumab, Avelumab | 49.2           | Univariate<br>HR 1.74<br>95%CI 1.11-2.74<br>p=0.02<br><br>Multivariate<br>HR 1.68<br>95%CI 1.01-2.82<br>p=0.05     | Univariate<br>HR 1.23<br>95%CI 0.85-1.78<br>p=0.27<br><br>Multivariate<br>HR 1.37<br>95%CI 0.92-2.04<br>p=0.12  | 24.4% vs 21.9%.                   |
| Tucker et al. (2021) | m-ccRCC     | 110                | Nivolumab-Ipilimumab                          | 26.4 (=median) | Univariate<br>NR vs 27.3 months<br>HR 3.22<br>p<0.01<br><br>Multivariate<br>HR 3.13<br>p<0.01                      | Univariate<br>8.6 vs 3.2 months<br>HR 2<br>p<0.01<br><br>Multivariate<br>HR 1.61<br>p=0.04                      | 40% vs 21.8%<br>OR 2.39<br>p=0.04 |
| Gil et al. (2022)    | mRCC        | 49                 | Nivolumab                                     | 48             | Univariate<br>24 vs 6 months<br>p=0.002<br><br>Multivariate<br>HR 3.85<br>95%CI 1.33-11.17<br>p=0.013              | Univariate<br>30 vs 3 months<br>p<0.001<br><br>Multivariate<br>HR 3.92<br>95%CI 1.66-9.23<br>p=0.002            | 87.5% vs 12.5%<br>p=0.003         |
| Beulque et al.       | m-ccRCC     | 201                | Nivolumab or Nivolumab-Ipilimumab             | 33.8 (=median) | Univariate<br>HR 1.326<br>95%CI 1.20-1.47<br>p<0.0001<br><br>Multivariate<br>HR 1.21<br>95%CI 1.07-1.38<br>p=0.003 | Univariate<br>HR 1.17<br>95%CI 1.06-1.29<br>p=0.002<br><br>Multivariate<br>HR 1.14<br>95%CI 1.01-1.28<br>p=0.04 | 37% vs 27%<br>p=0.17              |

m-ccRCC = metastatic clear cell renal cell cancer. HR = hazard ratio. NR = not reached
